# Supplementary material
Source: publisher figshare collection journal article supplement (https://frontiersin.figshare.com/ndownloader/files/16126214)
Supplement: Supplementary file [file 16126214]

## Supplementary Materials

Multiple sets of starting values were tested to determine the values that provided the best model fit, based on the lowest absolute Log-Likelihood Estimation (LLE) value. Chosen starting values were:  $\alpha = 1.2$ ,  $\lambda = 0.82$ ,  $\gamma = 0.672$ ,  $\delta = 1.672$ . Starting values for all dummy parameters were fixed to zero. Argument values that were used in the nlme function were: maxIter = 450, msMaxIter = 450, niterEM = 450, pnlsMaxIter = 400 (Pinheiro, Bates, DebRoy, Sarkar, & R\_Core\_Team, 2016). The resulting LLE value of this model was -4862.

### References

Pinheiro, J., Bates, D., DebRoy, S., Sarkar, D., & R\_Core\_Team. (2016). nlme: Linear and Nonlinear Mixed Effects Models. *R package version 3.1-128*, <http://CRAN.R-project.org/package=nlme>.
